# Supplementary material for: Classification and nomenclature of all human homeobox genes
Source: PubMed Central journal article supplement (PMC2211742; doi:10.1186/1741-7007-5-47), 2007-10-26

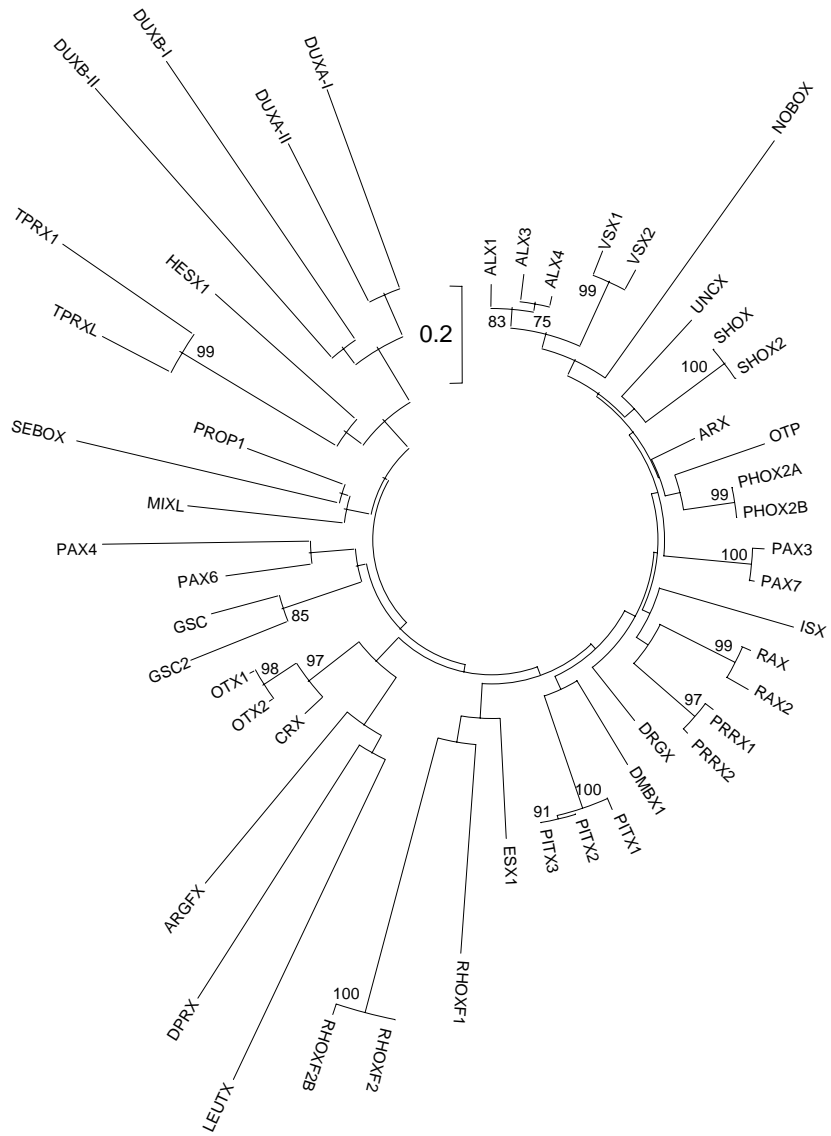

Supplement: 1741-7007-5-47-S4.pdf [file 1741-7007-5-47-S4.pdf]
