# Supplementary material for: Classification and nomenclature of all human homeobox genes
Source: PubMed Central journal article supplement (PMC2211742; doi:10.1186/1741-7007-5-47), 2007-10-26
Supplement: 1741-7007-5-47-S5.pdf [file 1741-7007-5-47-S5.pdf]

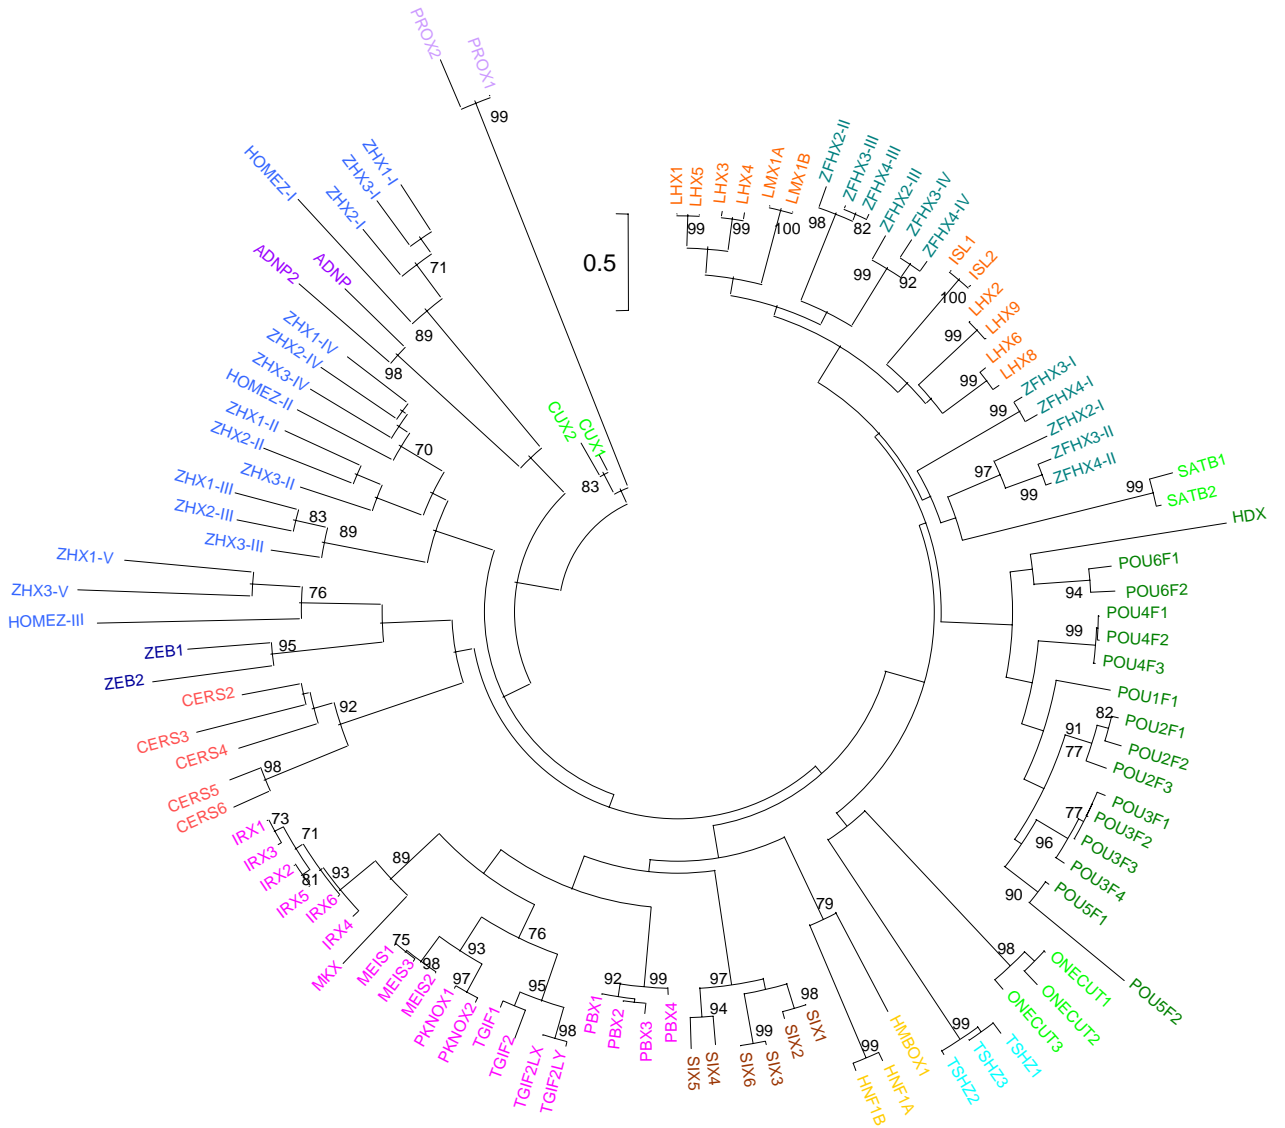

**KEY:**

- |                                                       |                                                        |   |          |
|-------------------------------------------------------|--------------------------------------------------------|---|----------|
| <span style="color: orange;">■</span> = LIM class     | <span style="color: purple;">■</span> = Adnp family    | } | ZF class |
| <span style="color: green;">■</span> = POU class      | <span style="color: cyan;">■</span> = Tshz family      |   |          |
| <span style="color: yellow;">■</span> = HNF class     | <span style="color: darkblue;">■</span> = Zeb family   |   |          |
| <span style="color: brown;">■</span> = SINE class     | <span style="color: teal;">■</span> = Zfhx family      |   |          |
| <span style="color: magenta;">■</span> = TALE class   | <span style="color: blue;">■</span> = Zhx/Homez family |   |          |
| <span style="color: lightgreen;">■</span> = CUT class | <span style="color: red;">■</span> = CERS class        |   |          |
| <span style="color: purple;">■</span> = PROS class    |                                                        |   |          |
