# Supplementary material for: Classification and nomenclature of all human homeobox genes
Source: PubMed Central journal article supplement (PMC2211742; doi:10.1186/1741-7007-5-47), 2007-10-26
Supplement: 1741-7007-5-47-S6.pdf [file 1741-7007-5-47-S6.pdf]

ANTP class

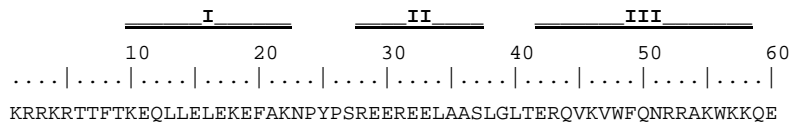

Accession ML bs NJ bs

HOXL subclass

|             |                 |                                                                  |              |     |     |
|-------------|-----------------|------------------------------------------------------------------|--------------|-----|-----|
| <b>Cdx</b>  | <b>Hs CDX1</b>  | KDKYRVVYTDHQRLELEKEFHYSRYITIRRKSELAANLGLTERQVKIWFQNRRAKWKQKVN    | NP_001795    | 100 | 80  |
|             | <b>Hs CDX2</b>  | KDKYRVVYTDHQRLELEKEFHYSRYITIRRKAEAAATLGLSERQVKIWFQNRRAKWKQKIN    | NP_001256    |     |     |
|             | <b>Hs CDX4</b>  | KEKYRVVYTDHQRLELEKEFHHCNRYITIQRKSELAVNLGLSERQVKIWFQNRRAKWKQKMI   | NP_005184    |     |     |
|             | <b>Dm cad</b>   | KDKYRVVYTDQFQRLELEKEFYCTSRYYITIRRKSELAQTLGLSERQVKIWFQNRRAKWKQKQN | NP_476954    |     |     |
| <b>Evx</b>  | <b>Hs EVX1</b>  | MRRYRTAFTRDQIARLEKEFYRENYVSRPRRCELAAALNLPETTICKVWFQNRRAKWKQKQR   | NP_001980    | 100 | 100 |
|             | <b>Hs EVX2</b>  | VRRYRTAFTRDQIARLEKEFYRENYVSRPRRCELAAALNLPETTICKVWFQNRRAKWKQKQR   | NP_001073927 |     |     |
|             | <b>Dm eve</b>   | VRRYRTAFTRDQIARLEKEFYRENYVSRPRRCELAAALNLPETTICKVWFQNRRAKWKQKQR   | NP_523670    |     |     |
| <b>Gbx</b>  | <b>Hs GBX1</b>  | SRRRRTAFTRDQIARLEKEFHCKKYLSTERSQIAHALKLSEVQVKIWFQNRRAKWKQKRIK    | NP_001092304 | 99  | 100 |
|             | <b>Hs GBX2</b>  | NRRRRTAFTRDQIARLEKEFHCKKYLSTERSQIAHALKLSEVQVKIWFQNRRAKWKQKRVK    | NP_001476    |     |     |
|             | <b>Dm unpg</b>  | SRRRRTAFTRDQIARLEKEFHCKKYLSTERSQIATSLKLSEVQVKIWFQNRRAKWKQKRVK    | NP_477146    |     |     |
| <b>Gsx</b>  | <b>Hs GSX1</b>  | SKRMRTAFTRDQIARLEKEFASNMYSRLRRIEIAATYLNLSERQVKIWFQNRRAKWKQKKEG   | NP_663632    | 98  | 100 |
|             | <b>Hs GSX2</b>  | GKRMRTAFTRDQIARLEKEFSSNMYSRLRRIEIAATYLNLSERQVKIWFQNRRAKWKQKKEG   | NP_573574    |     |     |
|             | <b>Dm ind</b>   | SKRIRTAFTSTQIARLEKEFASHNAYLSRLRRIEIANRRLSLSEKQVKIWFQNRRAKWKQKGG  | NP_996087    |     |     |
| <b>Hox1</b> | <b>Hs HOXA1</b> | PNAVRTNFSTKQIARLEKEFHFNKYLTRARRVEIAASLQNETQVKIWFQNRRAKWKQKRE     | NP_005513    | 98  | 99  |
|             | <b>Hs HOXB1</b> | PSGLRTNFSTKQIARLEKEFHFNKYLTRARRVEIAATLQNETQVKIWFQNRRAKWKQKRE     | NP_002135    |     |     |
|             | <b>Hs HOXD1</b> | SSAIRTNFSTKQIARLEKEFHFNKYLTRARRVEIANCLHLNDTQVKIWFQNRRAKWKQKRE    | NP_078777    |     |     |
|             | <b>Dm lab</b>   | NNSGRTNFSTKQIARLEKEFHFNRYLTRARRVEIAANTLQNETQVKIWFQNRRAKWKQKRV    | NP_476613    |     |     |
| <b>Hox2</b> | <b>Hs HOXA2</b> | SRRRLRTAYTNTQIARLEKEFHFNKYLTRARRVEIAALLDLTERQVKVWFQNRRAKWKQKRRQT | NP_006726    | 92  | 100 |
|             | <b>Hs HOXB2</b> | ARRLRTAYTNTQIARLEKEFHFNKYLTRARRVEIAALLDLTERQVKVWFQNRRAKWKQKRRQT  | NP_002136    |     |     |
|             | <b>Dm pb</b>    | PRRLRTAYTNTQIARLEKEFHFNKYLTRARRVEIAASLTLTERQVKVWFQNRRAKWKQKRRQT  | NP_476669    |     |     |
| <b>Hox3</b> | <b>Hs HOXA3</b> | SKRARTAYTSAQVLELEKEFHFNRYLCPRRVEMANLLNLTERQIKIWFQNRRAKWKQKDDQ    | NP_109377    | 69  | 68  |
|             | <b>Hs HOXB3</b> | SKRARTAYTSAQVLELEKEFHFNRYLCPRRVEMANLLNLTERQIKIWFQNRRAKWKQKDDQ    | NP_002137    |     |     |
|             | <b>Hs HOXD3</b> | SKRVRTAYTSAQVLELEKEFHFNRYLCPRRVEMANLLNLTERQIKIWFQNRRAKWKQKDDQ    | NP_008829    |     |     |
|             | <b>Sm Hox3b</b> | NKRSRTAYTSAQVLELEKEFHFNRYLCPRRVELASMLNLTERQIKIWFQNRRAKWKQKDDQ    | ABN42908     |     |     |
| <b>Hox4</b> | <b>Hs HOXA4</b> | PKRSRTAYTRQVLELEKEFHFNRYLTPRRRRIEIAHTLCLSERQIKIWFQNRRAKWKQKDDH   | NP_002132    | n/a | 39  |
|             | <b>Hs HOXB4</b> | PKRSRTAYTRQVLELEKEFHFNRYLTPRRRRIEIAHALCLSERQIKIWFQNRRAKWKQKDDH   | NP_076920    |     |     |
|             | <b>Hs HOXC4</b> | PKRSRTAYTRQVLELEKEFHFNRYLTPRRRRIEIAHSLCLSERQIKIWFQNRRAKWKQKDDH   | NP_055435    |     |     |
|             | <b>Hs HOXD4</b> | PKRSRTAYTRQVLELEKEFHFNRYLTPRRRRIEIAHTLCLSERQIKIWFQNRRAKWKQKDDH   | NP_055436    |     |     |
|             | <b>Dm Dfd</b>   | PKRQRTAYTRQVLELEKEFHFNRYLTPRRRRIEIAHTLVLSERQIKIWFQNRRAKWKQKDDH   | NP_477201    |     |     |
| <b>Hox5</b> | <b>Hs HOXA5</b> | GKRARTAYTRYQTLELEKEFHFNRYLTPRRRRIEIAHALCLSERQIKIWFQNRRAKWKQKDDN  | NP_061975    | n/a | 28  |
|             | <b>Hs HOXB5</b> | GKRARTAYTRYQTLELEKEFHFNRYLTPRRRRIEIAHALCLSERQIKIWFQNRRAKWKQKDDN  | NP_002138    |     |     |
|             | <b>Hs HOXC5</b> | GKRSRTSYTRYQTLELEKEFHFNRYLTPRRRRIEIANLCLNERQIKIWFQNRRAKWKQKDDN   | NP_061826    |     |     |
|             | <b>Dm Scr</b>   | TKRQRTSYTRYQTLELEKEFHFNRYLTPRRRRIEIAHALCLTERQIKIWFQNRRAKWKQKDDH  | NP_524248    |     |     |

|                     |                  |                                                                  |                                                               |                             |     |           |    |    |
|---------------------|------------------|------------------------------------------------------------------|---------------------------------------------------------------|-----------------------------|-----|-----------|----|----|
| <b>Hox6-8</b>       | <b>Hs HOXA6</b>  | GRRGRQTYTRYQTLELEKEEFHFNRYLTRRRRIEIANALCLTERQIKIWFQNRMRMKWKKEN   | NP_076919                                                     | 20                          | 39  |           |    |    |
|                     | <b>Hs HOXB6</b>  | GRRGRQTYTRYQTLELEKEEFHFNRYLTRRRRIEIAHALCLTERQIKIWFQNRMRMKWKKES   | NP_061825                                                     |                             |     |           |    |    |
|                     | <b>Hs HOXC6</b>  | RRRGRQIYSRYQTLELEKEEFHFNRYLTRRRRIEIANALCLTERQIKIWFQNRMRMKWKKES   | NP_004494                                                     |                             |     |           |    |    |
|                     | <b>Hs HOXA7</b>  | RKRGRQTYTRYQTLELEKEEFHFNRYLTRRRRIEIAHALCLTERQIKIWFQNRMRMKWKKEH   | NP_008827                                                     |                             |     |           |    |    |
|                     | <b>Hs HOXB7</b>  | RKRGRQTYTRYQTLELEKEEFHFNRYLTRRRRIEIAHTLCLTERQIKIWFQNRMRMKWKKEN   | NP_004493                                                     |                             |     |           |    |    |
|                     | <b>Hs HOXB8</b>  | RRRGRQTYSRYQTLELEKEEFLFNPYLTRKRRIEVSHALGLTERQVQIWFQNRMRMKWKKEN   | NP_076921                                                     |                             |     |           |    |    |
|                     | <b>Hs HOXC8</b>  | RRSGRQTYSRYQTLELEKEEFLFNPYLTRKRRIEVSHALGLTERQVQIWFQNRMRMKWKKEN   | NP_073149                                                     |                             |     |           |    |    |
|                     | <b>Hs HOXD8</b>  | RRRGRQTYSRFQTLELEKEEFLFNPYLTRKRRIEVSHALALTERQVQIWFQNRMRMKWKKEN   | NP_062458                                                     |                             |     |           |    |    |
|                     | <b>Dm Antp</b>   | RKRGRQTYTRYQTLELEKEEFHFNRYLTRRRRIEIAHALCLTERQIKIWFQNRMRMKWKKEN   | NP_996172                                                     |                             |     |           |    |    |
|                     | <b>Dm Ubx</b>    | RRRGRQTYTRYQTLELEKEEFHTNHYLTRRRRIEMAHALCLTERQIKIWFQNRMRMKLKKEI   | NP_536752                                                     |                             |     |           |    |    |
|                     | <b>Dm Abd-A</b>  | RRRGRQTYTRFQTLELEKEEFHFNHYLTRRRRIEIAHALCLTERQIKIWFQNRMRMKLKKEL   | NP_476693                                                     |                             |     |           |    |    |
|                     | <b>Hox9-13</b>   | <b>Hs HOXA9</b>                                                  | TRKKRCPYTKHQLELEKEEFLFNMYLTRDRRYEVARLLNLTDRQVQIWFQNRMRMKMKKIN |                             |     | NP_689952 | 66 | 61 |
|                     |                  | <b>Hs HOXB9</b>                                                  | SRKKRCPYTKYQLELEKEEFLFNMYLTRDRRHEVARLLNLSERQVQIWFQNRMRMKMKKMN |                             |     | NP_076922 |    |    |
| <b>Hs HOXC9</b>     |                  | TRKKRCPYTKYQLELEKEEFLFNMYLTRDRRYEVARVNLNLTDRQVQIWFQNRMRMKMKKMN   | NP_008828                                                     |                             |     |           |    |    |
| <b>Hs HOXD9</b>     |                  | TRKKRCPYTKYQLELEKEEFLFNMYLTRDRRYEVARILNLTDRQVQIWFQNRMRMKMKKMS    | NP_055028                                                     |                             |     |           |    |    |
| <b>Hs HOXA10</b>    |                  | GRKKRCPYTKHQLELEKEEFLFNMYLTRERRLEISRSVHLTDRQVQIWFQNRMRMKLKKMN    | NP_061824                                                     |                             |     |           |    |    |
| <b>Hs HOXC10</b>    |                  | GRKKRCPYTKHQLELEKEEFLFNMYLTRERRLEISKTINLTDRQVQIWFQNRMRMKLKKMN    | NP_059105                                                     |                             |     |           |    |    |
| <b>Hs HOXD10</b>    |                  | GRKKRCPYTKHQLELEKEEFLFNMYLTRERRLEISKSVNLNLTDRQVQIWFQNRMRMKLKKMS  | NP_002139                                                     |                             |     |           |    |    |
| <b>Hs HOXA11</b>    |                  | TRKKRCPYTKYQIRELEREFFFSVYINKEKRLQLSRMLNLTDRQVQIWFQNRMRMKEKKIN    | NP_005514                                                     |                             |     |           |    |    |
| <b>Hs HOXC11</b>    |                  | TRKKRCPYSKFOIRELEREFFFNVYINKEKRLQLSRMLNLTDRQVQIWFQNRMRMKEKKLS    | NP_055027                                                     |                             |     |           |    |    |
| <b>Hs HOXD11</b>    |                  | SRKKRCPYTKYQIRELEREFFFNVYINKEKRLQLSRMLNLTDRQVQIWFQNRMRMKEKKLN    | NP_067015                                                     |                             |     |           |    |    |
| <b>Hs HOXC12</b>    |                  | SRKKRKPYSKQLAELEGEFLVNEFITRQRRELSDRNLNLSQVQVQIWFQNRMRMKKKRLL     | NP_776272                                                     |                             |     |           |    |    |
| <b>Hs HOXD12</b>    |                  | ARKKRKPYTKQQLAELENEFLVNEFINRQKRKELSNRLNLSQVQVQIWFQNRMRMKKKRVV    | NP_067016                                                     |                             |     |           |    |    |
| <b>Hs HOXA13</b>    |                  | GRKKRVPYTKVQLKELEREYATNKFITDKRRRI SAATNLSERQVTIWFQNRMRVKEKKVI    | NP_000513                                                     |                             |     |           |    |    |
| <b>Hs HOXB13</b>    |                  | GRKKRIPYSKGQLRELEREYAAANKFITDKRRRI SAATSLSERQITIWFQNRMRVKEKKVL   | NP_006352                                                     |                             |     |           |    |    |
| <b>Hs HOXC13</b>    |                  | GRKKRVPYTKVQLKELEREYAAASKFITKEKRRRI SAATNLSERQVTIWFQNRMRVKEKKVV  | NP_059106                                                     |                             |     |           |    |    |
| <b>Hs HOXD13</b>    |                  | GRKKRVPYTKLQLKELENEYAINKFINKDKRRRI SAATNLSERQVTIWFQNRMRVKDKKIV   | NP_000514                                                     |                             |     |           |    |    |
| <b>Dm Abd-B</b>     |                  | VRKKRKPYSKFQLELEKEEFLFNAYVSKQRWELARNLQLTERQVQIWFQNRMRMKNKKNS     | NP_650577                                                     |                             |     |           |    |    |
| <b>Mnx</b>          | <b>Hs MNX1</b>   | CRRPRTAFTSQQLLELEHQFKFNKYLSPKRFEVATSLMLTETQVQIWFQNRMRMKWKRSK     | NP_005506                                                     | 90                          | 99  |           |    |    |
|                     | <b>Dm exex</b>   | TRRPRTAFTSQQLLELEHQFKQNKYLSRPKRFEVASGLMLSETQVQIWFQNRMRMKWKRSK    | NP_648164                                                     |                             |     |           |    |    |
| <b>Meox</b>         | <b>Hs MEOX1</b>  | ARKERTAFATKEQLRELEAEFAHNNYLTRLRRYEIAVNLDLTERQVQVWFQNRMRMKWKRVK   | NP_004518                                                     | 95                          | 100 |           |    |    |
|                     | <b>Hs MEOX2</b>  | PRKERTAFATKEQIRELEAEFAHNNYLTRLRRYEIAVNLDLTERQVQVWFQNRMRMKWKRVK   | NP_005915                                                     |                             |     |           |    |    |
|                     | <b>Dm btn</b>    | NRKERTAFSKTQLKQLEAEFCYSNYLTRLRRYEIAVALELTERQVQVWFQNRMRMKCKRIK    | NP_732768                                                     |                             |     |           |    |    |
| <b>Pdx</b>          | <b>Hs PDX1</b>   | NKRTRTAYTRAQLLELEKEEFLFNKYISRP RRVELAVMLNLTERRHIKIWFQNRMRMKWKKEE | NP_000200                                                     | 89                          | 100 |           |    |    |
|                     | <b>Ps Klox</b>   | NKRTRTAYTRAQLLELEKEEFHFNKYISRPRIELAAMLNLTERRHIKIWFQNRMRMKWKKDE   | AAK77134                                                      |                             |     |           |    |    |
| <b>NKL subclass</b> |                  |                                                                  |                                                               |                             |     |           |    |    |
| <b>Barhl</b>        | <b>Hs BARHL1</b> | PRKARTAFTHQLAQLERSFERQKYL SVQDRMELAAASLNLTDTQVKTWYQNRRTTKWKRQT   | NP_064448                                                     | 95                          | 94  |           |    |    |
|                     | <b>Hs BARHL2</b> | PRKARTAFSDHQLNQLERSFERQKYL SVQDRMDLAAALNLTDTQVKTWYQNRRTTKWKRQT   | NP_064447                                                     |                             |     |           |    |    |
|                     | <b>Dm B-H1</b>   | QRKARTAFTHQLQTLEKSFERQKYL SVQERQELAHKLDLSDCQVKTWYQNRRTTKWKRQT    | NP_523387                                                     |                             |     |           |    |    |
|                     | <b>Dm B-H2</b>   | QRKARTAFTHQLQTLEKSFERQKYL SVQDRMELANKLELSDCQVKTWYQNRRTTKWKRQT    | NP_523386                                                     |                             |     |           |    |    |
| <b>Barx</b>         | <b>Hs BARX1</b>  | GRRSRTVFTLEQLMGLKRFKQKYLSTPDRIDLAE SGLSQLQVKTWYQNRMRMKWKKIV      | NP_067545                                                     | prot/cnid homolog not found |     |           |    |    |
|                     | <b>Hs BARX2</b>  | PRRSRTIFTLEQLMGLKRFKQKYLSTPDRDLAQSGLTQLQVKTWYQNRMRMKWKKIV        | NP_003649                                                     |                             |     |           |    |    |
| <b>Bsx</b>          | <b>Hs BSX</b>    | RRKARTVFSDSQLSGLEKRFEIQRYLSTP PERVELATALSLSETQVKTWYQNRMRMKHKKQL  | NP_001091639                                                  | 89                          | 100 |           |    |    |
|                     | <b>Dm bsh</b>    | RRKARTVFSDPQLSGLEKRFEGQRYLSTP PERVELATALGLSETQVKTWYQNRMRMKHKKQL  | NP_477350                                                     |                             |     |           |    |    |

|              |                   |                                                                 |              |                             |     |
|--------------|-------------------|-----------------------------------------------------------------|--------------|-----------------------------|-----|
| <b>Dbx</b>   | <b>Hs DBX1</b>    | GMLRRAVFSDVQRKALEKMFQKQKYSKPDPRKKLAAKLGKDSQVKIWFONRRMKWRNSK     | EAW68342     | 94                          | 96  |
|              | <b>Hs DBX2</b>    | GILRRAVFSEDQRKALEKMFQKQKYSKTDPRKKLAINLGLKESQVKIWFONRRMKWRNSK    | NP_001004329 |                             |     |
|              | <b>Dm CG12361</b> | GMMRRAVFSDSQRKGLEKRFQKQKYSKPDPRKKLAERLGLKDSQVKIWFONRRMKWRNSK    | NP_647677    |                             |     |
| <b>Dlx</b>   | <b>Hs DLX1</b>    | IRKPRTIYSSLQLQALNRRFQQTQYLALPERAELAASLGLTQTQVKIWFONRRSKFKKLM    | NP_835221    | 100                         | 100 |
|              | <b>Hs DLX2</b>    | VRKPRTIYSSFOALALQRRFQKTQYLALPERAELAASLGLTQTQVKIWFONRRSKFKKMW    | NP_004396    |                             |     |
|              | <b>Hs DLX3</b>    | VRKPRTIYSSYQLAALQRRFQKAQYLALPERAELAAQLGLTQTQVKIWFONRRSKFKKLY    | NP_005211    |                             |     |
|              | <b>Hs DLX4</b>    | LRKPRTIYSSLQLQHLNQRFOHTQYLALPERAQLAAQLGLTQTQVKIWFONRRSKYKLL     | NP_612138    |                             |     |
|              | <b>Hs DLX5</b>    | VRKPRTIYSSFOALALQRRFQKTQYLALPERAELAASLGLTQTQVKIWFONRRSKIKKIM    | NP_005212    |                             |     |
|              | <b>Hs DLX6</b>    | IRKPRTIYSSLQLQALNRRFQQTQYLALPERAELAASLGLTQTQVKIWFONRRSKFKKLL    | NP_005213    |                             |     |
|              | <b>Dm D11</b>     | MRKPRTIYSSLOLQQLNRRFQRTQYLALPERAELAASLGLTQTQVKIWFONRRSKYKMM     | NP_523857    |                             |     |
| <b>Emx</b>   | <b>Hs EMX1</b>    | PKRIRTAFFSPQLLRLEHAFKKNHYVVGAEKQLAGSLSLSETQVKVWFONRRTKFKRQK     | NP_004088    | 92                          | 100 |
|              | <b>Hs EMX2</b>    | PKRIRTAFFSPQLLRLEHAFKKNHYVVGAEKQLAHSLSLTETQVKVWFONRRTKFKRQK     | NP_004089    |                             |     |
|              | <b>Dm ems</b>     | PKRIRTAFFSPQLLKLHAFESNQYVVGAEKALANLNLSETQVKVWFONRRTKHKRMQ       | NP_731868    |                             |     |
|              | <b>Dm E5</b>      | PKRVRTAFSPTQLLKLHAFEGNHVVGAEKQLAQGLSLTETQVKVWFONRRTKHKRMQ       | NP_524825    |                             |     |
| <b>En</b>    | <b>Hs EN1</b>     | DKRPRTAFATAEQLQRLKAEFQANRYITEQRRQTLAQELSLNESQIKIWFONRRRAKIKKAT  | NP_001417    | 97                          | 99  |
|              | <b>Hs EN2</b>     | DKRPRTAFATAEQLQRLKAEFQTNRYLTERRRQSLAQELSLNESQIKIWFONRRRAKIKKAT  | NP_001418    |                             |     |
|              | <b>Dm en</b>      | EKRPRTAFFSSEQLARLKREFNENRYLTERRRQQLSSELGLNEAQIKIWFONRRRAKIKKST  | NP_523700    |                             |     |
|              | <b>Dm inv</b>     | DKRPRTAFSGTQLARLKHEFNENRYLTERRRQQLSGELGLNEAQIKIWFONRRRAKIKKSS   | NP_725055    |                             |     |
| <b>Hhex</b>  | <b>Hs HHEX</b>    | RKGGQVRFNSDQTIIELEKFKFETQKYLSPPERKRLAKMLQLSERQVKIWFONRRRAKWRRLK | NP_002720    | 88                          | 85  |
|              | <b>Dm CG7056</b>  | RKGGQIRFTSQQTKNLEARFASSKYLSPERRHLALQLKLTDRQVKIWFONRRRAKWRAN     | NP_650938    |                             |     |
| <b>Hlx</b>   | <b>Hs HLX</b>     | RSWSRAVFSNLQRKGLEKRFQKQYVTKPDRKQLAAMLGLTDAQVKVWFONRRMKWRHHSK    | NP_068777    | n/a                         | n/a |
|              | <b>Dm H2.0</b>    | KRRSWSRAVFSNLQRKGLEIQKQYITKPDRRKLAARLNLTDQVKVWFONRRMKWRHTR      | NP_523488    |                             |     |
| <b>Lbx</b>   | <b>Hs LBX1</b>    | RRKSRTAFTNHQIYELKRFQKQYLSPADRDQIAQQLGLTNAQVITWFONRRRAKLRREL     | NP_006553    | 95                          | 94  |
|              | <b>Hs LBX2</b>    | RRKSRTAFTAQVLELERRFVFKYLAPSERDGLATRLGLANAQVITWFONRRRAKLRKRDV    | NP_001009812 |                             |     |
|              | <b>Dm lbe</b>     | KRRKSRTAFTNHQIFELKRFQKQYLSPADRDEIAASLGLSNAQVITWFONRRRAKQKQKDI   | NP_524435    |                             |     |
|              | <b>Dm lb1</b>     | KRRKSRTAFTNHQIFELKRFQKQYLSPADRDEIAGGLGLSNAQVITWFONRRRAKLRKDM    | NP_524434    |                             |     |
| <b>Msx</b>   | <b>Hs MSX1</b>    | NRKPRTPTFTAQLLALERKFRQKQYLSIAERAEFSSSLSLTETQVKIWFONRRRAKAKRLQ   | NP_002439    | 98                          | 100 |
|              | <b>Hs MSX2</b>    | NRKPRTPTFTSOLLALERKFRQKQYLSIAERAEFSSSLNLTETQVKIWFONRRRAKAKRLQ   | NP_002440    |                             |     |
|              | <b>Dm Dr</b>      | NRKPRTPTFTQQLLSLEKFKFREKQYLSIAERAEFSSSLRLTETQVKIWFONRRRAKAKRLQ  | NP_477324    |                             |     |
| <b>Nanog</b> | <b>Hs NANOG</b>   | KQKTRTVFSTQLCVLNDRFQRQKYLSSLQMQEELSNILNLSYKQVKIWFONRRMKSKRWQ    | NP_079141    | prot/cnid homolog not found |     |
| <b>Nk1</b>   | <b>Hs NKX1-1</b>  | PRRARTAFTYEQLVALENKFKATRYLSVCERLNLALSLSLTETQVKIWFONRRRTKWKQKQ   | XP_931434    | 100                         | 100 |
|              | <b>Hs NKX1-2</b>  | PRRARTAFTYEQLVALENKFRATRYLSVCERLNLALSLSLTETQVKIWFONRRRTKWKQKQ   | XP_372331    |                             |     |
|              | <b>Dm slou</b>    | PRRARTAFTYEQLVSLNENKFKTTRYLSVCERLNLALSLSLTETQVKIWFONRRRTKWKQKQ  | NP_476657    |                             |     |
| <b>Nk2-1</b> | <b>Hs NKX2-1</b>  | RRKRRVLFSAQVYELERRFKQKQYLSAPEREHLASMIHLTPTQVKIWFONHRYKMKRQA     | NP_001073136 | 62                          | 79  |
|              | <b>Hs NKX2-4</b>  | RRKRRVLFSAQVYELERRFKQKQYLSAPEREHLASMIHLTPTQVKIWFONHRYKMKRQA     | CAH71494     |                             |     |
|              | <b>Dm scro</b>    | RRKRRVLFQAQVYELERRFKQQRYSAPEREHLASLIHLTPTQVKIWFONHRYKCKRQA      | NP_001015473 |                             |     |
| <b>Nk2-2</b> | <b>Hs NKX2-2</b>  | KRKRRLVFSKAQTYELERRFRQQRYSAPEREHLASLIRLTPQVKIWFONHRYKMKRAR      | NP_002500    | 84                          | 62  |
|              | <b>Hs NKX2-8</b>  | RKRRVLFSAQVLELERRFRQQRYSAPEREQLASLRLTPQVKIWFONHRYKMKRAR         | NP_055175    |                             |     |
|              | <b>Dm vnd</b>     | KRKRRLVFTKAQTYELERRFRQQRYSAPEREHLASLIRLTPQVKIWFONHRYKTKRAQ      | NP_476786    |                             |     |
| <b>Nk3</b>   | <b>Hs NKX3-1</b>  | QKRSRAAFSHTQVIELERKFSHQKYLSPERAHLAKNLKLTETQVKIWFONRRYKTKRKQ     | NP_006158    | 79                          | 88  |
|              | <b>Hs NKX3-2</b>  | KKR.SRAAFSHAQVFELEERRFNHQRYLSGPERADLAASLKLTPQVKIWFONRRYKTKRKQ   | NP_001180    |                             |     |
|              | <b>Dm bap</b>     | KKR.SRAAFSHAQVFELEERRFAQQRYSLGPSEMAKSLRLTETQVKIWFONRRYKTKRKQ    | NP_732637    |                             |     |



|                 |                                                                                                     |                                                                                                                                                                                                                                                                                                                                                                                                 |                                                                            |     |                             |
|-----------------|-----------------------------------------------------------------------------------------------------|-------------------------------------------------------------------------------------------------------------------------------------------------------------------------------------------------------------------------------------------------------------------------------------------------------------------------------------------------------------------------------------------------|----------------------------------------------------------------------------|-----|-----------------------------|
| <b>Drgx</b>     | <b>Hs DRGX</b><br><b>Dm IP09201</b>                                                                 | QRRNRFTTFLQQLLEALEAVFAQT-HYPDVFTREELAMKINLTEARVQVWFQNRRAKWRKTE<br>QRRNRFTTFLQQLLEALETAFQAQT-HYPDVFTREDLAMKINLTEARVQVWFQNRRAKWRKAE                                                                                                                                                                                                                                                               | NP_001073989<br>ABK30908                                                   | 90  | 97                          |
| <b>Dux</b>      | <b>Hs DUXA-I</b><br><b>Hs DUXA-II</b><br><b>Hs DUXB-I</b><br><b>Hs DUXB-II</b>                      | HRRCRTKFTTEQLKILINTEFNQK-PYPGYATKQKLALINTEESRIQVWFQNRRARHGFGK<br>ARRCRTTYSASQLHTLIKAFMKN-PYPGIDSREELAKEIGVPESRVQVWFQNRRLSLLQR<br>FWRNRIQYNQSQKDILQSWFQHD-PFPDKAAREQLAKEIGVPESNIQVWFQKNYRVKQRKLD<br>ARQKQTFITWTQKNRLVQAFERN-PFPDIATRKKLAEQTGLQESRIQVWFQKQRSLYLKKS                                                                                                                                | NP_001012747<br>NP_001012747<br>unassigned<br>unassigned                   |     | prot/cnid homolog not found |
| <b>Esx</b>      | <b>Hs ESX1</b>                                                                                      | KRRRRTAFTQFQLQLELENFDES-QYPDVVARERLAARLNLTEDRVQVWFQNRRAKWRKRNQ                                                                                                                                                                                                                                                                                                                                  | NP_703149                                                                  |     | prot/cnid homolog not found |
| <b>Gsc</b>      | <b>Hs GSC</b><br><b>Hs GSC2</b><br><b>Dm Gsc</b>                                                    | KRRHRTIFTEQLLEALENLFQET-KYPDVGTRQLARKVHLREEKVEVWFKNRRAKWRKQK<br>TRRHRTIFSEEQLQALEALFVQN-QYPDVSTRELAGRIRLREERVEVWFKNRRAKWRHQK<br>KRRHRTIFTEQLLEALEATFDKT-HYPDVVLRQLALKVDLKEERVEVWFKNRRAKWRKQK                                                                                                                                                                                                    | NP_776248<br>NP_005306<br>NP_476949                                        | 74  | 77                          |
| <b>Hesx</b>     | <b>Hs HESX1</b>                                                                                     | GRRPRTAFTQNQLLEVENLERNV-CYPPGIDIREDLAQKLNLEEDRIQVWFQNRRAKLRSH                                                                                                                                                                                                                                                                                                                                   | NP_003856                                                                  |     | prot/cnid homolog not found |
| <b>Hopx</b>     | <b>Hs HOPX</b>                                                                                      | SAETASGPTEDQVEILEYNEFNKVDKHPDSTTLCLIAAEAGLSEETQVWFQKRLAKWRRSE                                                                                                                                                                                                                                                                                                                                   | NP_115884                                                                  |     | prot/cnid homolog not found |
| <b>Isx</b>      | <b>Hs ISX</b>                                                                                       | KRRVRTTFTTEQLHELEKIFHFT-HYPDVHIRSQLAARINLPEARVQVWFQNRRAKWRKQE                                                                                                                                                                                                                                                                                                                                   | NP_001008494                                                               |     | prot/cnid homolog not found |
| <b>Leutx</b>    | <b>Hs LEUTX</b>                                                                                     | YRRPRTRFLSKQLTALRELEKTMHPSLATMGKLASKLQLDLVSVKIVWFKNQRAKWRKQQ                                                                                                                                                                                                                                                                                                                                    | XP_001129035                                                               |     | prot/cnid homolog not found |
| <b>Mix</b>      | <b>Hs MIXL</b>                                                                                      | QRRKRTSFSAEQQLLELVFRRRT-RYPPDIHLRERLAALTLLPESRIQVWFQNRRAKSRQRS                                                                                                                                                                                                                                                                                                                                  | NP_114150                                                                  |     | prot/cnid homolog not found |
| <b>Nobox</b>    | <b>Hs NOBOX</b>                                                                                     | RKKTRTLYRSDQLLELEKIFQED-HYPDSDKREIAQTVGVTQPRIMVWFQNRRAKWRKME                                                                                                                                                                                                                                                                                                                                    | O60393                                                                     |     | prot/cnid homolog not found |
| <b>Otp</b>      | <b>Hs OTP</b><br><b>Dm otp</b>                                                                      | QKRHRTRFTPAQLNELERSEFAKT-HYPDIFMREELALRIGLTERVQVWFQNRRAKWKKRK<br>QKRHRTRFTPAQLNELERCFEAKT-HYPDIFMREELIAMRIGLTERVQVWFQNRRAKWKKRK                                                                                                                                                                                                                                                                 | NP_115485<br>NP_523799                                                     | 100 | 99                          |
| <b>Otx</b>      | <b>Hs OTX1</b><br><b>Hs OTX2</b><br><b>Hs CRX</b><br><b>Dm oc</b>                                   | QRRERTTFTRSQLDVLEALFAKT-RYPPDIFMREEVALKINLPESRVQVWFKNRRAKCRQQQ<br>QRRERTTFTRSQLDVLEALFAKT-RYPPDIFMREEVALKINLPESRVQVWFKNRRAKCRQQQ<br>QRRERTTFTRSQLELEALFAKT-QYPDVYAREEVALKINLPESRVQVWFKNRRAKCRQQR<br>QRRERTTFTRSQLDVLEALFGKT-RYPPDIFMREEVALKINLPESRVQVWFKNRRAKCRQQQ                                                                                                                              | NP_055377<br>NP_068374<br>NP_000545<br>NP_511091                           | 91  | 98                          |
| <b>Pax2/5/8</b> | <b>Hs PAX2</b><br><b>Hs PAX5</b><br><b>Hs PAX8</b>                                                  | KHLRADTFTQQQLLEALDRVFERP-SYPPDVFAQSE-----<br>KQMRGDLFTQQQLLEVLDRVFERQ-HYSDFITTE-----<br>KHLRTDAFSQHHLEPLECFE RQ-HYPEAYASPS-----                                                                                                                                                                                                                                                                 | NP_003981<br>NP_057953<br>NP_003457                                        |     | partial homeodomain         |
| <b>Pax3/7</b>   | <b>Hs PAX3</b><br><b>Hs PAX7</b><br><b>Dm prd</b><br><b>Dm gsb</b><br><b>Dm gsb-n</b>               | QRRSRTTFTAEQLEELERAFERT-HYPDIYTREELAQRALTEARVQVWFQNRRAKWRKQA<br>QRRSRTTFTAEQLEELERAFERT-HYPDIYTREELAQRALTEARVQVWFQNRRAKWRKQA<br>QRRCRTTFSASQLDELERAFERT-QYPDIYTREELAQRNLTEARIQVWFQNRRAKWRKQH<br>QRRSRTTFSNDQIDALERIFART-QYPDVYTREELAQSTGLTEARVQVWFQNRRAKWRKQL<br>QRRSRTTFTAEQLEELERAFERT-QYPDVYTREELAQSTGLTEARIQVWFQNRRAKWRKHS                                                                  | NP_852122<br>NP_002575<br>NP_523556<br>NP_523863<br>NP_523862              | 78  | 79                          |
| <b>Pax4/6</b>   | <b>Hs PAX4</b><br><b>Hs PAX6</b><br><b>Dm ey</b><br><b>Dm eyg</b><br><b>Dm toy</b><br><b>Dm toe</b> | GHRNRTIFSPSQAEALEKBFQRG-QYPDSVARGKLATATSLPEDTVRWFQNRRAKWRRQE<br>LQRNRTSFTQEQIEALEKBFERT-HYPDVFARERLAAKIDLPEARIQVWFQNRRAKWRREE<br>LQRNRTSFTNDQIDSLEKBFERT-HYPDVFARERLAGKIGLPEARIQVWFQNRRAKWRREE<br>FRNRTTFSPEQLELEKBFEDKS-HYPCVSTRELRSSRTSLSEARVQVWFQNRRAKWRRHQ<br>LQRNRTSFSNEQIDSLEKBFERT-HYPDVFARERLADKIGLPEARIQVWFQNRRAKWRREE<br>FRNRTTFSPEQLELEKBFEDKS-HYPCVNTREKLAARTALSEARVQVWFQNRRAKWRRHQ | NP_006184<br>NP_001595<br>NP_524628<br>NP_524042<br>NP_524638<br>NP_524041 | 28  | 29                          |
| <b>Phox</b>     | <b>Hs PHOX2A</b><br><b>Hs PHOX2B</b><br><b>Dm PHDP</b>                                              | QRRIRTTFTSAQLKELERVFAET-HYPDIYTREELALKIDLTEARVQVWFQNRRAKFRKQE<br>QRRIRTTFTSAQLKELERVFAET-HYPDIYTREELALKIDLTEARVQVWFQNRRAKFRKQE<br>QRRIRTTFTSNQLNELERIFLET-HYPDIYTREELIASKLHLTEARVQVWFQNRRAKFRKQE                                                                                                                                                                                                | NP_005160<br>NP_003915<br>NP_523834                                        | 75  | 71                          |



|        |            |                                                               |              |     |     |
|--------|------------|---------------------------------------------------------------|--------------|-----|-----|
| Lhx1/5 | Hs LHX1    | RRGPRTTIKAKOLETLKAAFAATPKPTRHIREQLAQETGLNMRVIVVWFQNRKSKERRMK  | NP_005559    | 96  | 89  |
|        | Hs LHX5    | RRGPRTTIKAKOLETLKAAFAATPKPTRHIREQLAQETGLNMRVIVVWFQNRKSKERRMK  | NP_071758    |     |     |
|        | Dm Lim1    | RRGPRTTIKAKOLEVLKTAFNQTPKPTRHIREQLAKETGLPMRVIVVWFQNRKSKERRMK  | NP_572505    |     |     |
| Lhx2/9 | Hs LHX2    | TKRMRTSFKHHQLRTMKSIFYAINHNPDAKDLKQLAQKTGLTKRVLQVWFQNRRAKFRRLN | NP_004780    | 98  | 100 |
|        | Hs LHX9    | TKRMRTSFKHHQLRTMKSIFYAINHNPDAKDLKQLAQKTGLTKRVLQVWFQNRRAKFRRLN | NP_064589    |     |     |
|        | Dm ap      | TKRMRTSFKHHQLRTMKSIFYAINHNPDAKDLKQLSQKTGLPKRVLQVWFQNRRAKWRMM  | NP_724428    |     |     |
| Lhx3/4 | Hs LHX3    | AKRPRTTITAKOLETLKSAYNTSPKPARHVREQLSSETGLDMRVVQVWFQNRRAKEKRLK  | NP_055379    | 94  | 99  |
|        | Hs LHX4    | AKRPRTTITAKOLETLKNAYKNSPKPARHVREQLSSETGLDMRVVQVWFQNRRAKEKRLK  | NP_203129    |     |     |
|        | Dm Lim3    | NKRPRTTITAKOLETLKTAYNNSPKPARHVREQLSSETGLDMRVVQVWFQNRRAKEKRLK  | NP_476606    |     |     |
| Lhx6/8 | Hs LHX6    | AKRARTSFTAELQVQMQAQAQDNNPDAQTLQKLAADTGLSRVIVVWFQNRARHKKHT     | NP_055183    | 58  | 54  |
|        | Hs LHX8    | AKRARTSFTADQLQVQMQAQAQDNNPDAQTLQKLAERTGLSRVIVVWFQNRARHKKHV    | NP_001001933 |     |     |
|        | Dm Awh     | TKRVRTTFTTEELQVLQANFQIDSNPDGQDLERIASVTGLSKRVTVVWFQNSRARQKKHI  | NP_523907    |     |     |
| Lmx    | Hs LMX1A   | PKRPRTILTTQORRAFKASFEVSSPKCRKVRETLAAETGLSVRVVQVWFQNRRAKMKKLA  | NP_796372    | 100 | 100 |
|        | Hs LMX1B   | PKRPRTILTTQORRAFKASFEVSSPKCRKVRETLAAETGLSVRVVQVWFQNRRAKMKKLA  | NP_002307    |     |     |
|        | Dm CG32105 | PKRPRTILTSQQRKQFKASFDQSPKCRKVREALAKDTGLSVRVVQVWFQNRRAKMKKIQ   | NP_729801    |     |     |
|        | Dm CG4328  | PKRPRTILNTQORRAFKASFEVSPKCRKVRETLAKDTGLSLRIVQVWFQNRRAKVKKIQ   | NP_648567    |     |     |

**POU class**

|                  |           | I                                                                       |  |    |  |    |  |    |  |    |  | II |  |    |  |    |  |    |  |    |  | III       |  |       |  |       |  |  |  |  |  |                  |  |                             |  |              |  |
|------------------|-----------|-------------------------------------------------------------------------|--|----|--|----|--|----|--|----|--|----|--|----|--|----|--|----|--|----|--|-----------|--|-------|--|-------|--|--|--|--|--|------------------|--|-----------------------------|--|--------------|--|
|                  |           | 10                                                                      |  | 20 |  | 30 |  | 40 |  | 50 |  | 60 |  | 30 |  | 40 |  | 50 |  | 60 |  | Accession |  | ML bs |  | NJ bs |  |  |  |  |  |                  |  |                             |  |              |  |
| <b>Consensus</b> |           | KRRK---RTTFTKEQLLELEKEFAKNPY---PSREEREELAASGLGLTERQVKVWFQNRRAKWKQ       |  |    |  |    |  |    |  |    |  |    |  |    |  |    |  |    |  |    |  |           |  |       |  |       |  |  |  |  |  | <b>Accession</b> |  | <b>ML bs</b>                |  | <b>NJ bs</b> |  |
| <b>Hdx</b>       | Hs HDX    | SRKRALQDRITQFSDRDLATLKKYWDNGMTSLGVSVCREKIEAVATELNVDCIEIVRTWIGNRRRKYRLMG |  |    |  |    |  |    |  |    |  |    |  |    |  |    |  |    |  |    |  |           |  |       |  |       |  |  |  |  |  | NP_653258        |  | prot/cnid homolog not found |  |              |  |
| <b>Pou1</b>      | Hs POU1F1 | KRRK---RTTISIAAKDALEHFGEQNK---PSSQEIMRMAEELNLEKEVVRVWFQNRQREKRVK        |  |    |  |    |  |    |  |    |  |    |  |    |  |    |  |    |  |    |  |           |  |       |  |       |  |  |  |  |  | NP_000297        |  | 94                          |  | 90           |  |
|                  | Nv POU1   | RKRK---RTTIGLAAKEALENHFMKQTK---PSSPEIVRIADGLRLDKEVVRVWFQNRQREKRVK       |  |    |  |    |  |    |  |    |  |    |  |    |  |    |  |    |  |    |  |           |  |       |  |       |  |  |  |  |  | ABB86471         |  |                             |  |              |  |
| <b>Pou2</b>      | Hs POU2F1 | RRKK---RTSIE TNIRVALEKSFLENQK---PTSEEITMIADQLNMEKEVIRVWFQNRQREKRVK      |  |    |  |    |  |    |  |    |  |    |  |    |  |    |  |    |  |    |  |           |  |       |  |       |  |  |  |  |  | NP_002688        |  | 83                          |  | 79           |  |
|                  | Hs POU2F2 | RRKK---RTSIE TNVRFALKSFLENQK---PTSEEILLIAEQHMEKEVIRVWFQNRQREKRVK        |  |    |  |    |  |    |  |    |  |    |  |    |  |    |  |    |  |    |  |           |  |       |  |       |  |  |  |  |  | NP_002689        |  |                             |  |              |  |
|                  | Hs POU2F3 | KRRK---RTSIE TNIRLTKERFQDNPK---PSSEELSMIAEQLSMEKEVVRVWFQNRQREKRVK       |  |    |  |    |  |    |  |    |  |    |  |    |  |    |  |    |  |    |  |           |  |       |  |       |  |  |  |  |  | NP_055167        |  |                             |  |              |  |
|                  | Dm nub    | RRKK---RTSIE TTIRGALKAFLENQK---PTSEEITQLADRLSMEKEVVRVWFQNRQREKRVK       |  |    |  |    |  |    |  |    |  |    |  |    |  |    |  |    |  |    |  |           |  |       |  |       |  |  |  |  |  | NP_476659        |  |                             |  |              |  |
|                  | Dm pdm2   | RRKK---RTSIE TTIVRTLEKAFLENQK---PTSEEISQLSERLNMDEKEVIRVWFQNRQREKRVK     |  |    |  |    |  |    |  |    |  |    |  |    |  |    |  |    |  |    |  |           |  |       |  |       |  |  |  |  |  | NP_523558        |  |                             |  |              |  |
| <b>Pou3</b>      | Hs POU3F1 | KRRK---RTSIEVGVKGALESHFLKCPK---PSAHEITGLADSLQLEKEVVRVWFQNRQREKRVK       |  |    |  |    |  |    |  |    |  |    |  |    |  |    |  |    |  |    |  |           |  |       |  |       |  |  |  |  |  | NP_002690        |  | 83                          |  | 93           |  |
|                  | Hs POU3F2 | KRRK---RTSIEVSVKGALESHFLKCPK---PSAQEITSLADSLQLEKEVVRVWFQNRQREKRVK       |  |    |  |    |  |    |  |    |  |    |  |    |  |    |  |    |  |    |  |           |  |       |  |       |  |  |  |  |  | NP_005595        |  |                             |  |              |  |
|                  | Hs POU3F3 | KRRK---RTSIEVSVKGALESHFLKCPK---PSAQEITNLADSLQLEKEVVRVWFQNRQREKRVK       |  |    |  |    |  |    |  |    |  |    |  |    |  |    |  |    |  |    |  |           |  |       |  |       |  |  |  |  |  | NP_006227        |  |                             |  |              |  |
|                  | Hs POU3F4 | KRRK---RTSIEVSVKGVLETHFLKCPK---PAAQEITSLADSLQLEKEVVRVWFQNRQREKRVK       |  |    |  |    |  |    |  |    |  |    |  |    |  |    |  |    |  |    |  |           |  |       |  |       |  |  |  |  |  | NP_000298        |  |                             |  |              |  |
|                  | Dm vv1    | KRRK---RTSIEVSVKGALESHFLKCPK---PSAQEITSLADSLQLEKEVVRVWFQNRQREKRVK       |  |    |  |    |  |    |  |    |  |    |  |    |  |    |  |    |  |    |  |           |  |       |  |       |  |  |  |  |  | NP_523948        |  |                             |  |              |  |
| <b>Pou4</b>      | Hs POU4F1 | KRRK---RTSIAAPEKRSLEAYFAVQPR---PSSEKIAAIAEKLDLKKNVVRVWFQNRQKQKRMK       |  |    |  |    |  |    |  |    |  |    |  |    |  |    |  |    |  |    |  |           |  |       |  |       |  |  |  |  |  | NP_006228        |  | 95                          |  | 100          |  |
|                  | Hs POU4F2 | KRRK---RTSIAAPEKRSLEAYFAIQPR---PSSEKIAAIAEKLDLKKNVVRVWFQNRQKQKRMK       |  |    |  |    |  |    |  |    |  |    |  |    |  |    |  |    |  |    |  |           |  |       |  |       |  |  |  |  |  | NP_004566        |  |                             |  |              |  |
|                  | Hs POU4F3 | RKRK---RTSIAAPEKRSLEAYFAIQPR---PSSEKIAAIAEKLDLKKNVVRVWFQNRQKQKRMK       |  |    |  |    |  |    |  |    |  |    |  |    |  |    |  |    |  |    |  |           |  |       |  |       |  |  |  |  |  | NP_002691        |  |                             |  |              |  |
|                  | Dm acj6   | KRRK---RTSIAAPEKRSLEAYFAVQPR---PSGEKIAAIAEKLDLKKNVVRVWFQNRQKQKRIV       |  |    |  |    |  |    |  |    |  |    |  |    |  |    |  |    |  |    |  |           |  |       |  |       |  |  |  |  |  | NP_524876        |  |                             |  |              |  |







CUT class

|               |                   | I                                                                       | II | III |    |    |    |                  |                             |              |
|---------------|-------------------|-------------------------------------------------------------------------|----|-----|----|----|----|------------------|-----------------------------|--------------|
|               |                   | 10                                                                      | 20 | 30  | 40 | 50 | 60 |                  |                             |              |
|               |                   | ..... ..... ..... ..... ..... ..... ..... ..... ..... ..... ..... ..... |    |     |    |    |    |                  |                             |              |
|               | <b>Consensus</b>  | KRRKRRTTFTTKEQLLELEKEFAK-NPYPSPREEREELAASLGLTERQVKVWFQNRRAKWKQEQE       |    |     |    |    |    | <b>Accession</b> | <b>ML bs</b>                | <b>NJ bs</b> |
| <b>Cux</b>    | <b>Hs CUX1</b>    | LKKPRVVLAPPEEKEALKRAYQQ-KYPSPKPTIEDLATQNLKLTSTVINWFHNYRSRIRREL          |    |     |    |    |    | NP_853530        | 90                          | n/a          |
|               | <b>Hs CUX2</b>    | IKKPRVVLAPPEEKEALKRAYQL-EPYPSQQTIELLSFQNLKLTNTVINWFHNYRSRMRREM          |    |     |    |    |    | NP_056082        |                             |              |
|               | <b>Dm ct</b>      | SKKQRVLFSEEQKEALRLAFAL-DYPNVGTIEFLANELGLATRTITNWFHNYRMRRLKQQV           |    |     |    |    |    | NP_524764        |                             |              |
| <b>Onecut</b> | <b>Hs ONECUT1</b> | PKKPRLVFTDVQRRTLHAIFKE-NKRPSKELQITISQQLGLELSTVSNFFMNAARRSLDKW           |    |     |    |    |    | NP_004489        | 99                          | 96           |
|               | <b>Hs ONECUT2</b> | QKKSRLVFTDLQRRTLFAIFKE-NKRPSKEMQITISQQLGLELSTVSNFFMNAARRSLEKW           |    |     |    |    |    | NP_004843        |                             |              |
|               | <b>Hs ONECUT3</b> | PKKQRLVFTDLQRRTLIAIFKE-NKRPSKEMQVTISQQLGLELNTVSNFFMNAARRRCMNRW          |    |     |    |    |    | NP_001073957     |                             |              |
|               | <b>Dm onecut</b>  | PKKPRLVFTDLQRRTLQAIIFKE-TKRPSKEMQVTIARQLGLEPTTVGNFFMNAARRSMDKW          |    |     |    |    |    | NP_524842        |                             |              |
| <b>Satb</b>   | <b>Hs SATB1</b>   | KTRPRTKISVEALGILQSFIQDVGLYPDEEAIQTLSAQLDLPKYTIKFFQNRQRYLKHGG            |    |     |    |    |    | NP_002962        | prot/cnid homolog not found |              |
|               | <b>Hs SATB2</b>   | KPRSRTKISLEALGILQSFIDVGLYPDQEAHITLSAQLDLPKHTIHKFFQNRQRYHVKHHG           |    |     |    |    |    | NP_056080        |                             |              |

PROS class

|             |                  | I                                                                   | II | III |    |    |    |                  |              |              |
|-------------|------------------|---------------------------------------------------------------------|----|-----|----|----|----|------------------|--------------|--------------|
|             |                  | 10                                                                  | 20 | 30  | 40 | 50 | 60 |                  |              |              |
|             |                  | ..... ..... ..... ..... ..... ..... ..... ..... ..... ..... .....   |    |     |    |    |    |                  |              |              |
|             | <b>Consensus</b> | KRRKRRTTFTTKEQLLELEKEFAKNPYPSPREEREELAASLGLT---ERQVKVWFQNRRAKWKQEQE |    |     |    |    |    | <b>Accession</b> | <b>ML bs</b> | <b>NJ bs</b> |
| <b>Prox</b> | <b>Hs PROX1</b>  | GSAMQEGLSPEHLKAKLMFFYTRYPSSNMLKTYFSDVKFNRCITSQLKWFNSNREFYYIQM       |    |     |    |    |    | NP_002754        | 100          | 99           |
|             | <b>Hs PROX2</b>  | LVHTQEGLNPGHLKAKLMFFFTRYPSSNLLKVYFPDVQFNRCITSQLKWFNSNREFYYIQM       |    |     |    |    |    | NP_001073877     |              |              |
|             | <b>Dm pros</b>   | MAPTSSTLTPMHLRKAALMFFWVRYPSSAVLKMYPDKFNKNNTAQLVKWFNSNREFYYIQM       |    |     |    |    |    | NP_731565        |              |              |

ZF class

|             |                  | I                                                                 | II | III |    |    |    |                  |                             |              |
|-------------|------------------|-------------------------------------------------------------------|----|-----|----|----|----|------------------|-----------------------------|--------------|
|             |                  | 10                                                                | 20 | 30  | 40 | 50 | 60 |                  |                             |              |
|             |                  | ..... ..... ..... ..... ..... ..... ..... ..... ..... ..... ..... |    |     |    |    |    |                  |                             |              |
|             | <b>Consensus</b> | KRRKRRTTFTTKEQLLELEKEFAKNPYPSPREEREELAASLGLTERQVKVWFQNRRAKWKQEQE  |    |     |    |    |    | <b>Accession</b> | <b>ML bs</b>                | <b>NJ bs</b> |
| <b>Adnp</b> | <b>Hs ADNP</b>   | PKGHEDDSYEARKSFLTKYFNKQPYPTREIEKLAASLWLKSLIASHFSNKRKCKVRDC        |    |     |    |    |    | NP_056154        | prot/cnid homolog not found |              |
|             | <b>Hs ADNP2</b>  | PKKYEGRSYEEKKQFLKDYFHKKPYPSKKEIEELSSLFVWVKIDVASFFGKRRYICMKAI      |    |     |    |    |    | NP_055728        |                             |              |



|                       |                     | I                                                                       | II | III |    |    |    |                  |                             |              |
|-----------------------|---------------------|-------------------------------------------------------------------------|----|-----|----|----|----|------------------|-----------------------------|--------------|
|                       |                     | 10                                                                      | 20 | 30  | 40 | 50 | 60 |                  |                             |              |
|                       |                     | ..... .. .. ..... ..... ..... ..... ..... ..... ..... ..... ..... ..... |    |     |    |    |    |                  |                             |              |
| <b>Consensus</b>      |                     | KRRKRRTT-FTKEQLLELEKEFAKNPYPSPREEREELAASLGLTERQVKVWFQNRRAKWKQ           |    |     |    |    |    | <b>Accession</b> | <b>ML bs</b>                | <b>NJ bs</b> |
| <b>Zhx/<br/>Homez</b> | <b>Hs ZHX1-I</b>    | NSIPTYN-AALDNNPLLLNTYNKFPYPTMSEITVLSAQAKYTEEQIKIWFSAQRLKHGVS            |    |     |    |    |    | NP_001017926     | prot/cnid homolog not found |              |
|                       | <b>Hs ZHX2-I</b>    | LNTTKYN-SALDTNATMINSFNKFPYPTQAELSWLTAASKHPEEHIRIWFATQRLKHGIS            |    |     |    |    |    | NP_055758        |                             |              |
|                       | <b>Hs ZHX3-I</b>    | SSIPTYN-AAMDSNSFLKNSFHKFPYPTKAELCYLTVVTKYPEEQLKIWFTAQRLKQGIS            |    |     |    |    |    | NP_055850        |                             |              |
|                       | <b>Hs HOMEZ-I</b>   | WTQAAQT-SELDSNEHLLKTFSYFPYPSLADIALLCRLRYGLQMEKVKTWEMAQRLRCGIS           |    |     |    |    |    | NP_065885        |                             |              |
|                       | <b>Hs ZHX1-II</b>   | SFGIRAK-KTKEQLAELKVSYLKNQFPDSEIIRLMKITGLTKGEIKKWFSDTRYNQNSK             |    |     |    |    |    | NP_001017926     |                             |              |
|                       | <b>Hs ZHX2-II</b>   | TPASDRK-KTKEQIAHLKASFLQSQFPDDAEVYRLIEVTGLARSEIKKWFSDHRYRCQGI            |    |     |    |    |    | NP_055758        |                             |              |
|                       | <b>Hs ZHX3-II</b>   | ASIYKKN-KSHEQLSALKGSFCRNQFPQGSEVEHLTKVTGLSTREVRKWFSDRRYHCRNLK           |    |     |    |    |    | NP_055850        |                             |              |
|                       | <b>Hs ZHX1-III</b>  | TPQKFKE-KTAEQLRVLQASFLNSSLVLTDEELNRLRAQTKLRRREIDAWTEKKKSKALKE           |    |     |    |    |    | NP_001017926     |                             |              |
|                       | <b>Hs ZHX2-III</b>  | APQKFKE-KTQGQVKILEDSFLKSSFPQAELDRLRVETKLSRREIDSWFSERRKLRDSME            |    |     |    |    |    | NP_055758        |                             |              |
|                       | <b>Hs ZHX3-III</b>  | TPTKYKE-RAPEQLRALESSFAQNPLPLDEELDRLRSETKMTREIDSWFSERRKKNVAEE            |    |     |    |    |    | NP_055850        |                             |              |
|                       | <b>Hs ZHX1-IV</b>   | STGKICK-KTPEQLHMLKSAFVRTQWPSPEEYDKLAKESGLARTDIVSWFGDTRYAWKNGN           |    |     |    |    |    | NP_001017926     |                             |              |
|                       | <b>Hs ZHX2-IV</b>   | SPSPAIA-KSQEQVHLLRSTFARTQWPTPQEYDQLAAKTGLVTEIVRWFKENRCLLKTGT            |    |     |    |    |    | NP_055758        |                             |              |
|                       | <b>Hs ZHX3-IV</b>   | PGKVSCK-KTAQQRHLLRQLFVQTQWPSNQDYDSIMAQTGLRPEVVRWFGDSRYALKNGQ            |    |     |    |    |    | NP_055850        |                             |              |
|                       | <b>Hs HOMEZ-II</b>  | RQRKTKR-KTKEQLAILKSFFLQCQWARREDYQKLEQITGLRPEIIQWFGDTRYALKHGQ            |    |     |    |    |    | NP_065885        |                             |              |
|                       | <b>Hs ZHX1-V</b>    | DRGPSLI-KFKTGTAILKDYYLKHKFLNEQDLDELVNKSHMGYEQVREWFAERQRRSELGI           |    |     |    |    |    | NP_001017926     |                             |              |
|                       | <b>Hs ZHX3-V</b>    | FPPGLLV-IAPGNRELLQDYMTKMLYEEDLQNLCDKTQMSSQVQWFAEKMGEETRAV               |    |     |    |    |    | NP_055850        |                             |              |
|                       | <b>Hs HOMEZ-III</b> | TPPLPIP-PPPPDIQPLERYWAAHQQLRETDIPQLSQASRLSTQQVLDWEDSRLPQPAEVV           |    |     |    |    |    | NP_065885        |                             |              |

**CERS class**

|                  |                 | I                                                                       | II | III |    |    |    |                  |              |              |
|------------------|-----------------|-------------------------------------------------------------------------|----|-----|----|----|----|------------------|--------------|--------------|
|                  |                 | 10                                                                      | 20 | 30  | 40 | 50 | 60 |                  |              |              |
|                  |                 | ..... ..... ..... ..... .. .. ..... ..... ..... ..... ..... ..... ..... |    |     |    |    |    |                  |              |              |
| <b>Consensus</b> |                 | KRRKRRTTFTKEQLLELEKEFAK-NPYPSPREEREELAASLGLTERQVKVWFQNRRAKWKQ           |    |     |    |    |    | <b>Accession</b> | <b>ML bs</b> | <b>NJ bs</b> |
| <b>Cers</b>      | <b>Hs CERS2</b> | NIKEKTRLRAPPNATLEHFYLTSGKQPKQVEVELLSRQSGLSGRQVERWFRRRRNQDRPESL          |    |     |    |    |    | NP_859530        | 87           | 78           |
|                  | <b>Hs CERS3</b> | GIKETV-RKVTPNTVLENFFFKHSTRQPLQTDIYGLAKKCNLTERQVERWFRSRRNQERPSR          |    |     |    |    |    | NP_849164        |              |              |
|                  | <b>Hs CERS4</b> | GVRDQTRRQVKPNATLEKHFLTEGHRPKQPQLSLLAAQCGLTLQQTQRWFRRRRNQDRPQL           |    |     |    |    |    | NP_078828        |              |              |
|                  | <b>Hs CERS5</b> | GIEDSGPYQAQPNAILKVKFISITKYPDKKRLEGLSKQLDWNVRKIQQWFRHRRNODKPPPT          |    |     |    |    |    | NP_671723        |              |              |
|                  | <b>Hs CERS6</b> | NIQANGPQIAPPNAILKVKFTAITKHPDEKRLEGLSKQLDWDVRSIQRWFRRRRNQEKPEST          |    |     |    |    |    | NP_982288        |              |              |
|                  | <b>Dm Lag1</b>  | GIRSSRPKKAANVPILEKTYAKSTRLDKKK-LVPLSKQTDMSEREIERWWRRLRRAQDKPEST         |    |     |    |    |    | NP_727075        |              |              |
